# Supplementary material
Source: PubMed Central journal article supplement (PMC5494505)

Source Data

Figure 1D

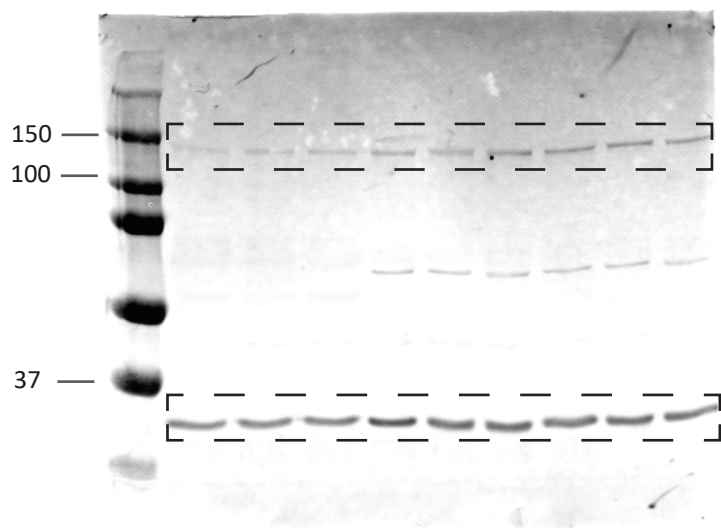

Supplement: EMBR-18-1166-s002.pdf [file EMBR-18-1166-s002.pdf]

Figure 6

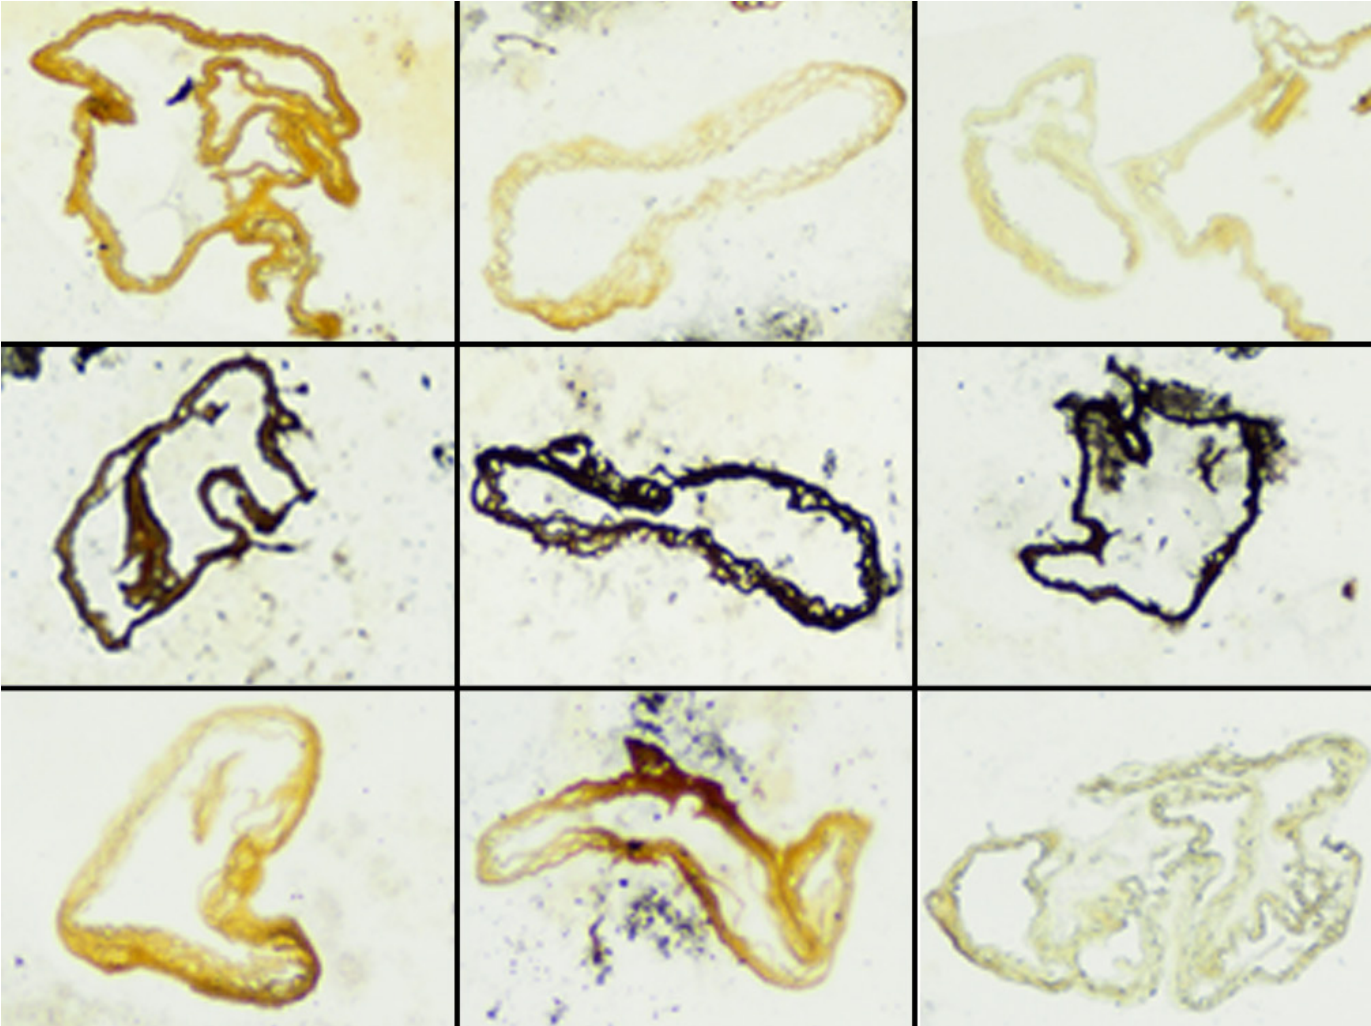

Supplement: EMBR-18-1166-s003.pdf [file EMBR-18-1166-s003.pdf]
